# Supplementary material for: Hectd3 promotes pathogenic Th17 lineage through Stat3 activation and Malt1 signaling in neuroinflammation
Source: PubMed Central journal article supplement (PMC6370850; doi:10.1038/s41467-019-08605-3), 2019-02-11
Supplement: 41467_2019_8605_MOESM1_ESM.pdf [file 41467_2019_8605_MOESM1_ESM.pdf]

1

2 Hectd3 promotes pathogenic Th17 lineage through Stat3 activation and Malt1 signaling in neuroinflammation

3

Cho et al.

4

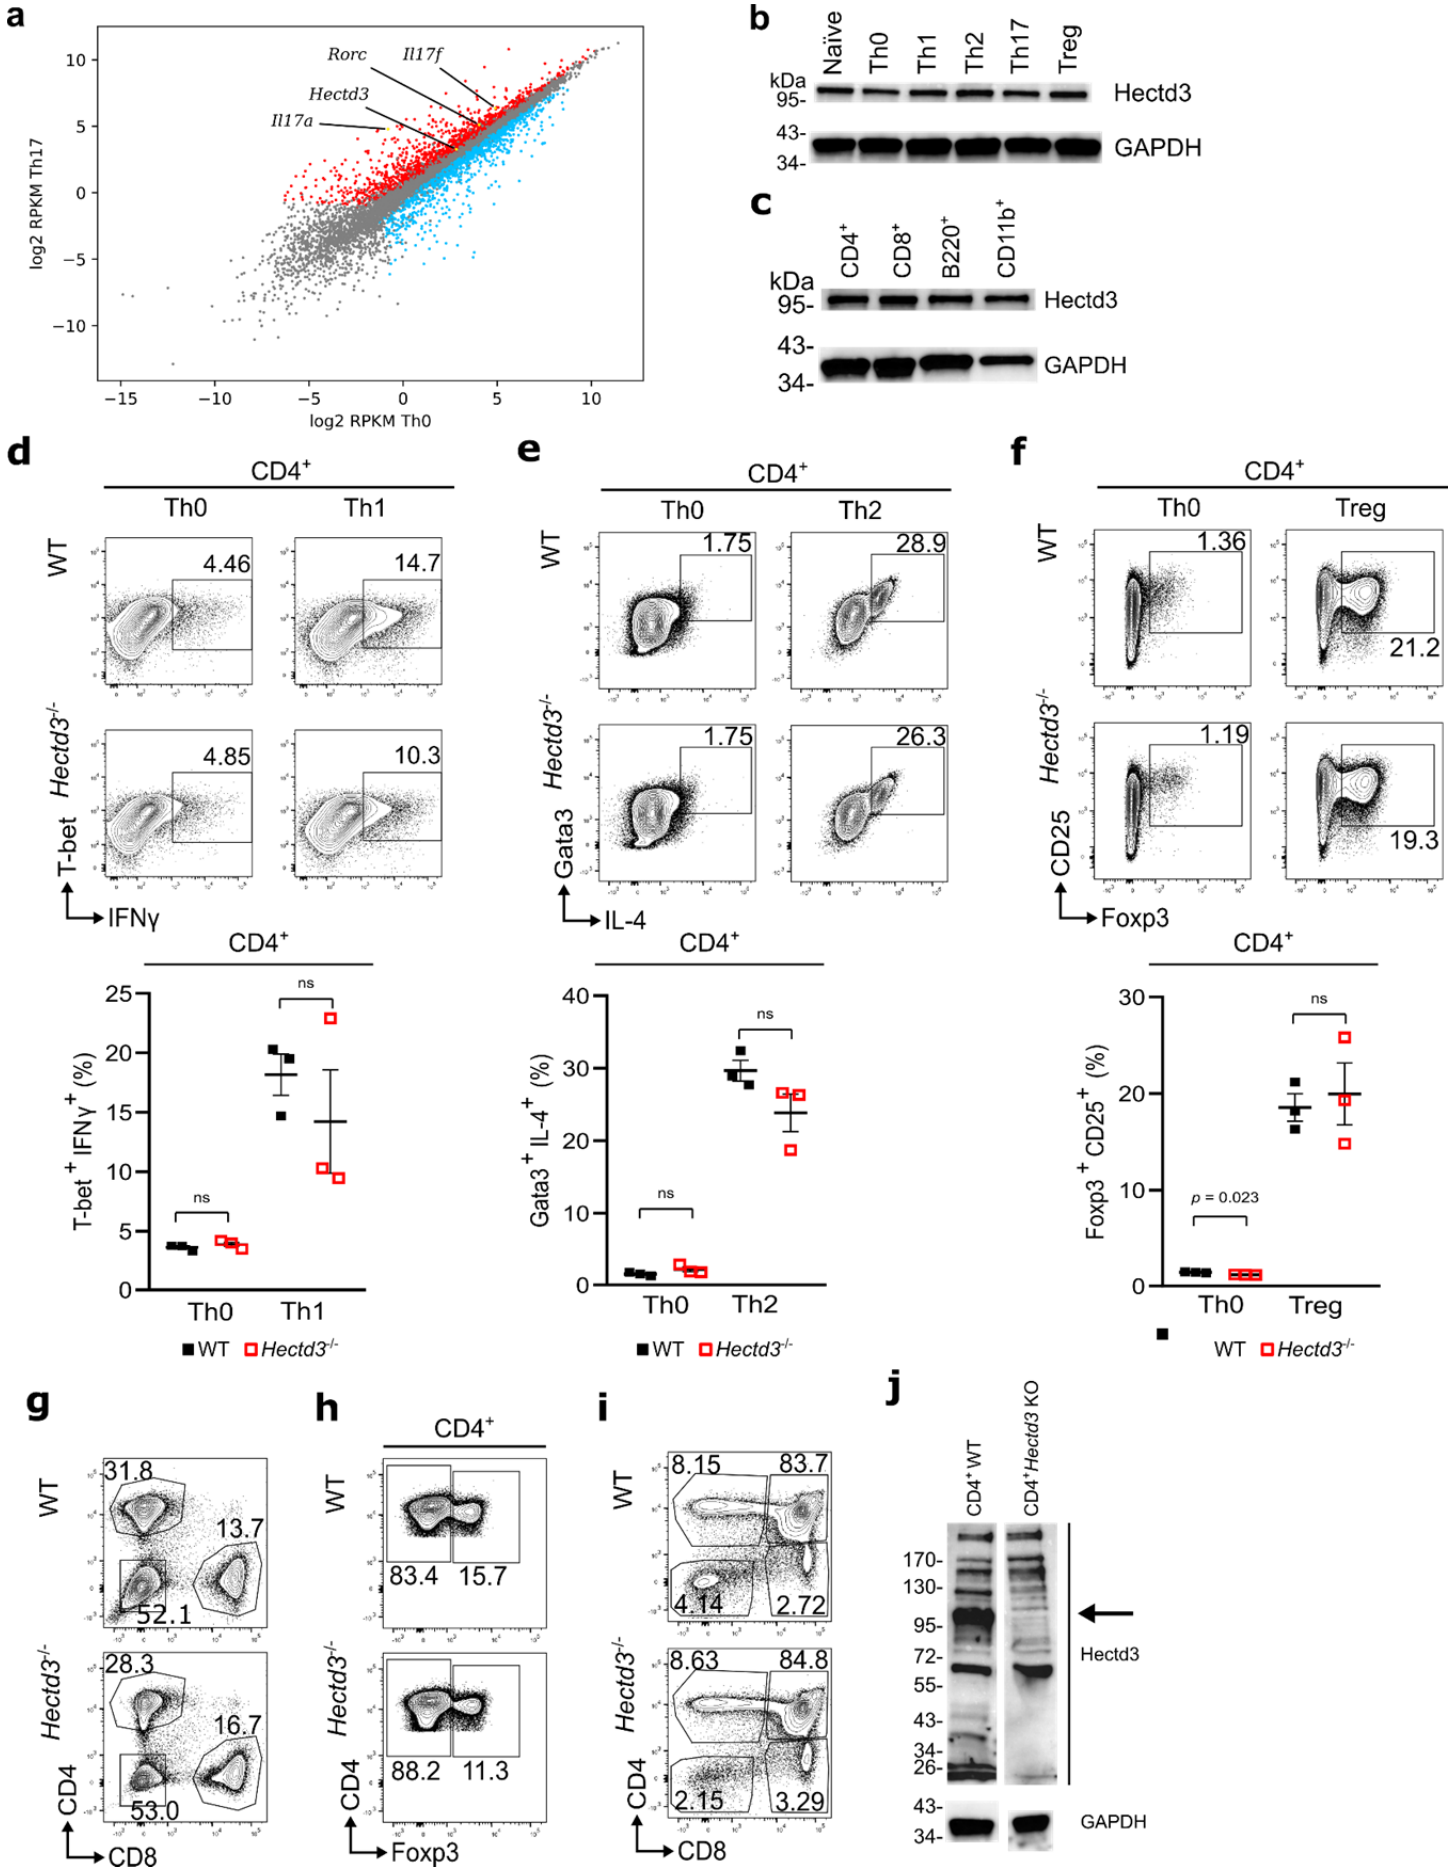

6 **Supplementary Figure 1**

7 **Thymic and peripheral T cell populations and polarization into Th1, Th2, and Treg conditions are**  
8 **normal in the absence of Hectd3.** **a** RNA-sequencing of *in vitro* polarized mouse wild type Th17 and Th0  
9 cells as reported by Ciofani, *et al*<sup>1</sup>. Data are shown as a scatter plot of log2 of reads per kilobase per million  
10 mapped reads (RPKM). Blue dots represent >2 z-score downregulated genes, and red dots represent >2 z-  
11 score upregulated genes in Th17 cells relative to Th0 cells. Genes of interest are indicated and marked in  
12 yellow (upregulated) with the following z-scores: *Hectd3* 2.42, *Rorc* 8.93, *Il-17a* 6.71, *Il-17f* 7.05 (from <sup>1</sup>). **b**  
13 Representative immunoblot of Hectd3 and GAPDH in WT naïve and *in vitro* polarized CD4<sup>+</sup> T cells. **c**  
14 Representative immunoblot of Hectd3 and GAPDH in WT purified CD4<sup>+</sup> T, CD8<sup>+</sup> T, B220<sup>+</sup>, and CD11b<sup>+</sup> cells.  
15 **(b-c)** Data are representative of two independent experiments. **d-f** Representative flow cytometry analysis and  
16 frequencies of T-bet and IFN $\gamma$  (**d**), Gata3 and IL-4 (**e**) and Foxp3 and CD25 (**f**) from *in vitro* polarized *Hectd3*<sup>-/-</sup>  
17 and WT CD4<sup>+</sup> T cells under Th0, Th1 (**d**), Th2 (**e**), and Treg (**f**) conditions. Purified CD4<sup>+</sup> T cells were cultured  
18 and polarized as described in Materials and Methods. **(d-f)** Data are presented as mean  $\pm$  SEM and derived  
19 from two independent experiments; *p* values were obtained from Student's t test. Gating strategy shown in  
20 Supplemental Figure 9. **g-i** Representative flow cytometry analysis of CD4<sup>+</sup> and CD8<sup>+</sup> T cell populations (**g**)  
21 and Treg cells (**h**) in peripheral lymph nodes, and of thymic populations (**i**) in *Hectd3*<sup>-/-</sup> and WT mice at steady  
22 state. **j** Representative immunoblot of Hectd3 and GAPDH in purified CD4<sup>+</sup> T of *Hectd3*<sup>-/-</sup> and WT CD4<sup>+</sup> mice.  
23 Representative of two independent experiments. Arrow indicates specific Hectd3 band. Source data are  
24 provided as a Source Data file.

25  
26  
27  
28  
29  
30  
31  
32  
33  
34  
35  
36  
37  
38  
39  
40  
41  
42  
43

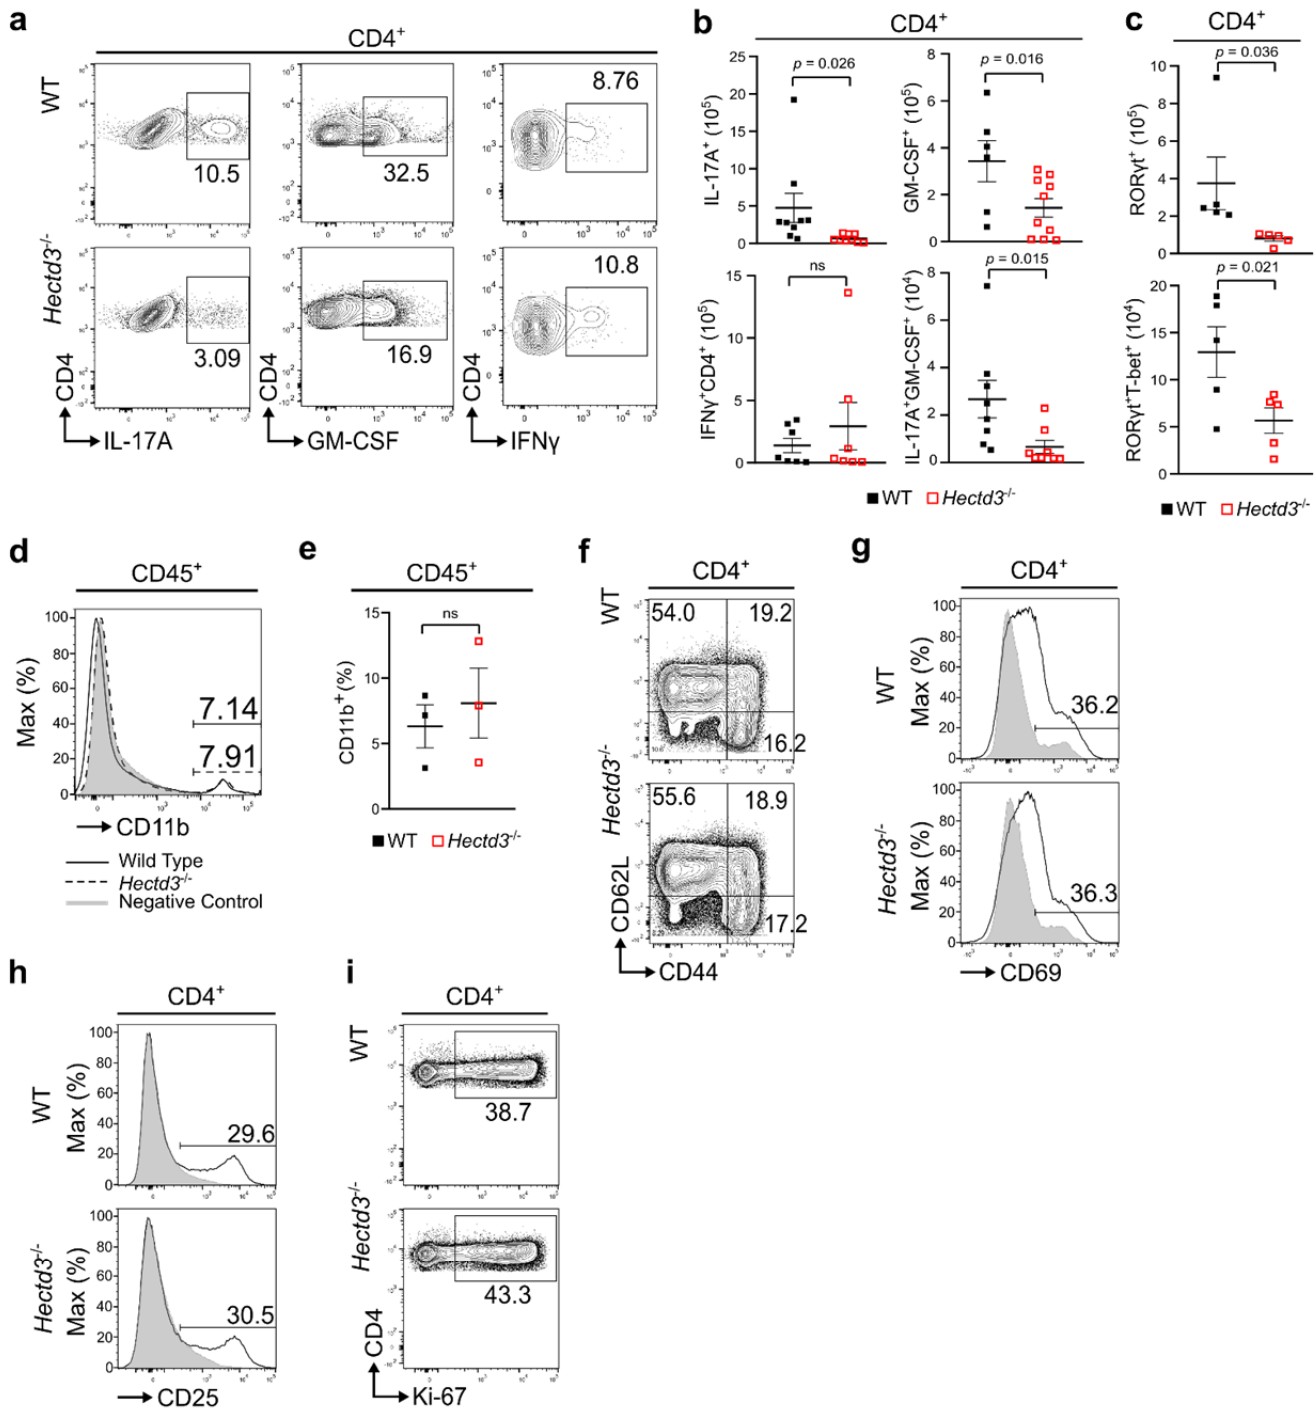

45 **Supplementary Figure 2**

46 **IL-17A, GM-CSF, and ROR $\gamma$ t are diminished in *Hectd3*<sup>-/-</sup> CD4<sup>+</sup> T cells of mice induced with EAE but**  
47 **activation and proliferation are not altered. a** Representative flow cytometry analysis of intracellular IL-17A,  
48 GM-CSF, and IFN $\gamma$  in CD4<sup>+</sup> T cell from the draining lymph nodes dLNs of *Hectd3*<sup>-/-</sup> and WT mice, 13 days  
49 following EAE induction; n=5 per group from three independent experiments. Gating strategy shown in  
50 Supplemental Figure 9. **b** Absolute numbers of IL-17A<sup>+</sup>, GM-CSF<sup>+</sup>, IFN $\gamma$ <sup>+</sup>, and IL-17A<sup>+</sup>GM-CSF<sup>+</sup> CD4<sup>+</sup> T cells  
51 in the draining lymph nodes of *Hectd3*<sup>-/-</sup> and wild type mice 13 days following EAE induction. **c** Absolute  
52 numbers of ROR $\gamma$ t<sup>+</sup> CD4<sup>+</sup> T cells and ROR $\gamma$ t<sup>+</sup> T-bet<sup>+</sup> CD4<sup>+</sup> T cells in dLNs of *Hectd3*<sup>-/-</sup> and WT mice, 13 days  
53 following EAE induction. **d-e** Flow cytometry analysis of CD11b from the CNS of *Hectd3*<sup>-/-</sup> and WT mice 22  
54 days following EAE induction. Gating strategy was first on CD45<sup>+</sup> T cells. **f** Flow cytometry analysis of CD44<sup>+</sup>,  
55 CD62L<sup>+</sup>, and CD44<sup>+</sup>CD62L<sup>+</sup> CD4<sup>+</sup> T cells from dLNs of *Hectd3*<sup>-/-</sup> and WT mice 7 days following EAE induction.  
56 Gating strategy show in Supplemental Figure 9. **g-h** Flow cytometry analysis of surface CD69 (**g**) and CD25  
57 (**h**) on CD4<sup>+</sup> T cells from dLNs of *Hectd3*<sup>-/-</sup> and WT mice 7 days following EAE induction. Gating strategy  
58 shown on Supplemental Figure 9. **i** Flow cytometry analysis of intranuclear Ki-67 in CD4<sup>+</sup> T cells from dLNs of  
59 *Hectd3*<sup>-/-</sup> and WT mice 7 days following EAE induction. Gating strategy shown in Supplemental Figure 9. **(a,d,f-**  
60 **i)** Data (n = 6) are representative of three independent experiments. **(b,c,e)** Data are presented as mean  $\pm$   
61 SEM; *p* values was obtained from Student's t test. Source data are provided as a Source Data file.

62  
63  
64  
65  
66  
67  
68  
69  
70  
71  
72  
73  
74  
75  
76  
77  
78  
79  
80  
81  
82

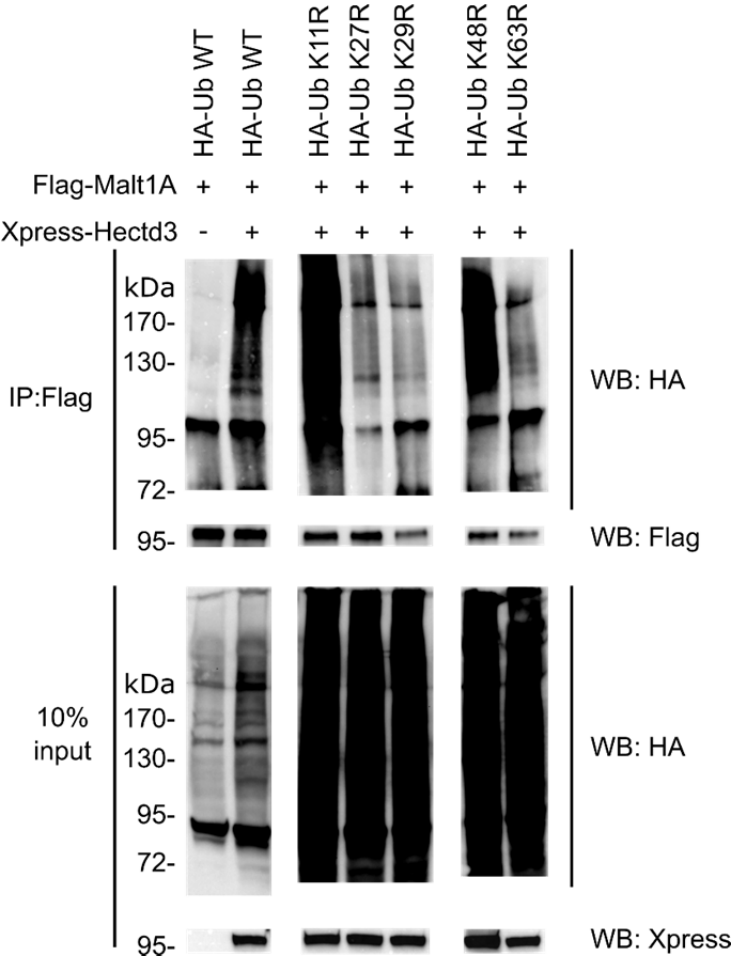

84

85

86 **Supplementary Figure 3**

87 **Hectd3 promotes K27- and K29-linked polyubiquitin on Malt1A.** Immunoblot of HA and Flag following two-  
 88 step Flag immunoprecipitation of protein extracts from HEK293T cells co-transfected with the indicated HA-Ub  
 89 K to R mutants, Flag-Malt1A and Xpress-Hectd3. HA-Ub K to R single mutant denote that the indicated lysine  
 90 residue is mutated to arginine in the HA-Ub. Immunoblots are representative of two independent experiments.  
 91 Source data are provided as a Source Data file.

92

93

94

95

96

97

98

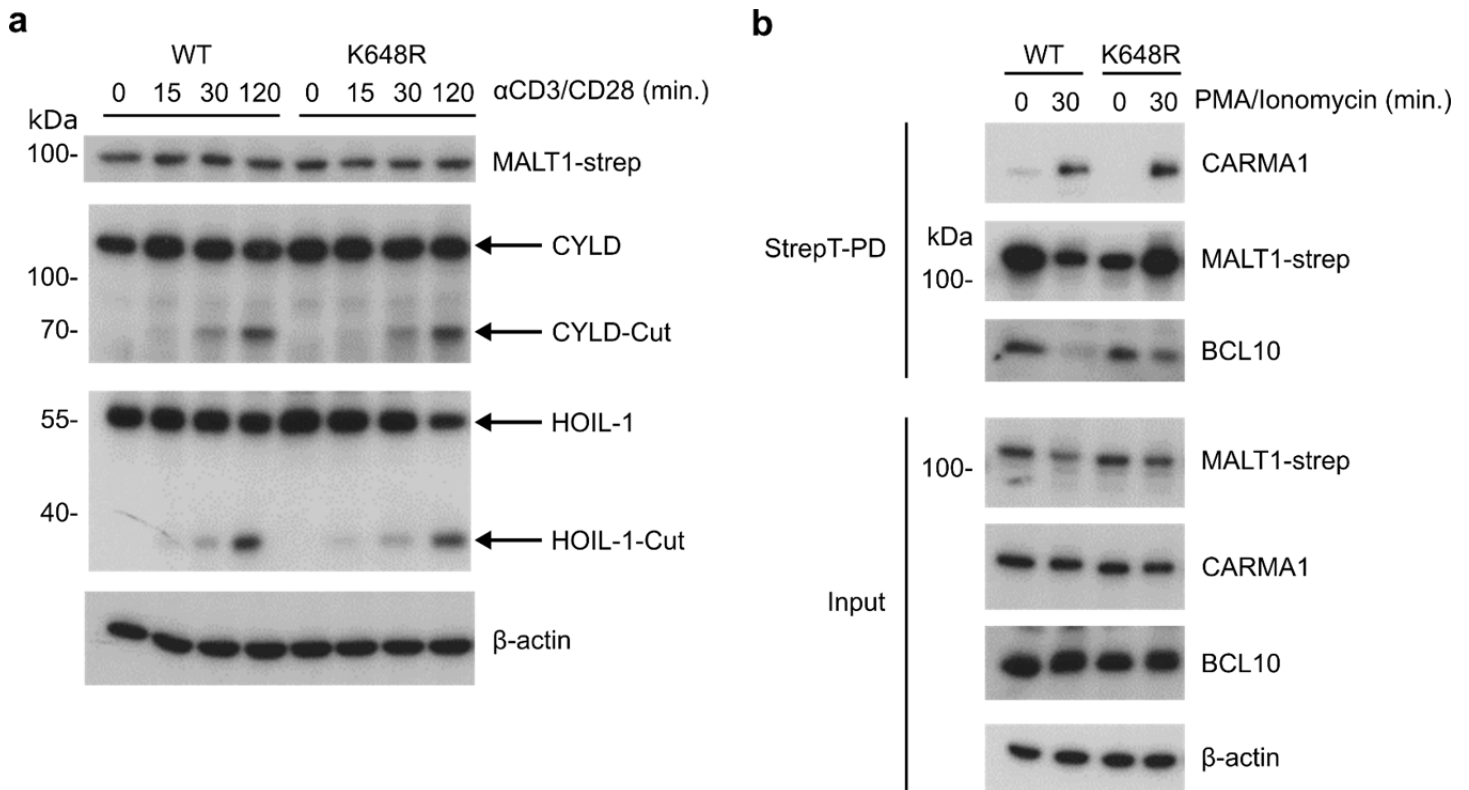

**Supplementary Figure 4**

**Malt1A K648R does not affect Malt1 substrate cleavage and CMB complex formation in Jurkat cells. a**

Immunoblot of MALT1-strep, CYLD, HOIL-1, and β-actin of protein extracts from MALT1KO Jurkat cells transduced with MSCV-Malt1A WT or MSCV-Malt1A K648R following the indicated duration of αCD3/CD28 stimulation.

**b** Immunoblot of CARMA1, MALT1-strep, BCL10, and β-actin following StrepTactin pulldown (StrepT-PD) of protein extracts from MALT1KO Jurkat cells transduced with MSCV-Malt1A WT or MSCV-Malt1A K648R.

**(a-b)** Immunoblots are representative of two independent experiments. Source data are provided as a Source Data file.

99  
100  
101  
102  
103  
104  
105  
106  
107  
108  
109  
110  
111  
112  
113  
114  
115  
116  
117  
118  
119  
120  
121

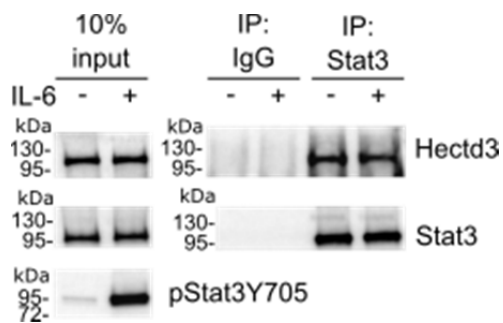

122  
123

124 **Supplementary Figure 5**

125 **Hectd3 associates with Stat3 CD4<sup>+</sup> T cells regardless of IL-6 stimulation.** Immunoblot of Hectd3, Stat3  
 126 and pStat3 Y705 following Stat3 immunoprecipitation of protein extracts from WT CD4<sup>+</sup> T cells stimulated or  
 127 not with IL-6 (50 ng/ml) for 30 min. Representative of 3 independent experiments. Source data are provided as  
 128 a Source Data file.

129  
130  
131  
132  
133  
134  
135  
136  
137  
138  
139  
140  
141  
142  
143  
144  
145



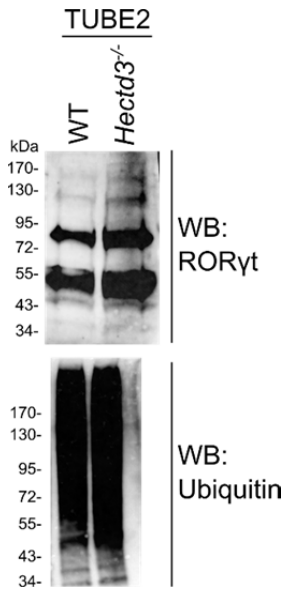

146

147

### 148 **Supplementary Figure 6**

149 **Hectd3 does not promote polyubiquitination of RORyt in EAE CD4<sup>+</sup> T cells.** Immunoblot for RORyt and  
150 ubiquitin following polyubiquitinated protein enrichment with TUBE2 of extracts from the dLN CD4<sup>+</sup> T cells of  
151 *Hectd3*<sup>-/-</sup> and WT mice 13 days following EAE induction. Representative of two independent experiments.  
152 Source data are provided as a Source Data file.

153

154

155

156

157

158

159

160

161

162

163

164

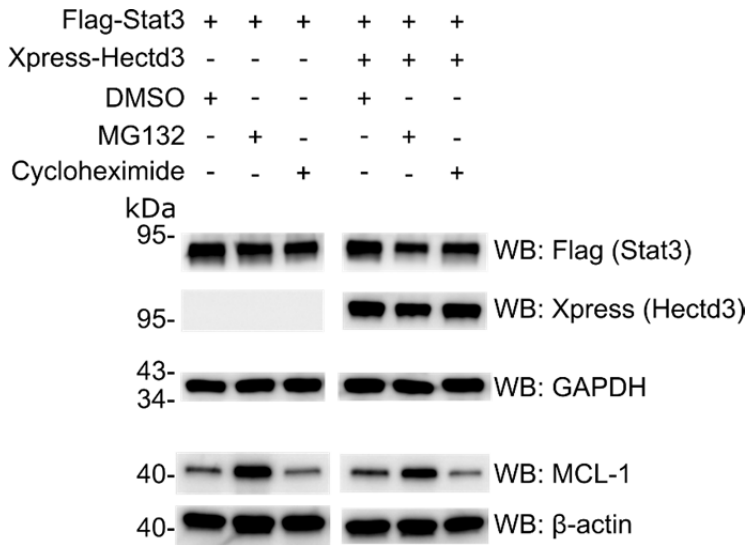

167 **Supplementary Figure 7**

168 **Hectd3 does not target Stat3 for proteasomal degradation.** Immunoblot of Flag, Xpress, GAPDH, MCL-1,  
 169 and  $\beta$ -actin of protein extracts from HEK293T cells co-transfected as indicated with Flag-Stat3 and Xpress-  
 170 Hectd3 and treated for 4 hours with 20  $\mu$ M MG132 or 15  $\mu$ g/mL cycloheximide prior to protein extraction.  
 171 Immunoblots are representative of two independent experiments. Source data are provided as a Source Data  
 172 file.

173  
 174  
 175  
 176  
 177  
 178  
 179  
 180  
 181  
 182  
 183  
 184

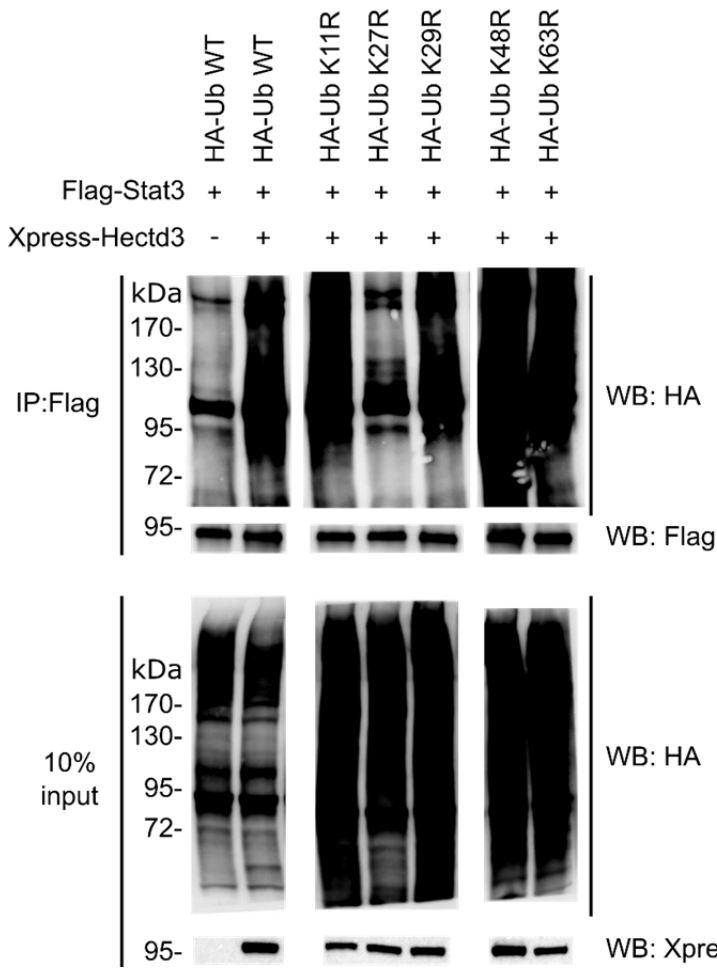

185

186

187

### Supplementary Figure 8

188

**Hectd3 promotes K27-linked polyubiquitin chain on Stat3.** Immunoblot of HA and Flag following two-step Flag immunoprecipitation of protein extracts from HEK293T cells co-transfected as indicated with HA-Ub K to R mutants, Flag-Stat3, and Xpress-Hectd3. HA-Ub K to R single mutants denote that the indicated lysine residue is mutated to arginine in the HA-Ub. Immunoblot is representative of two independent experiments. Source data are provided as a Source Data file.

193

194

195

196

197

198

199

200

a

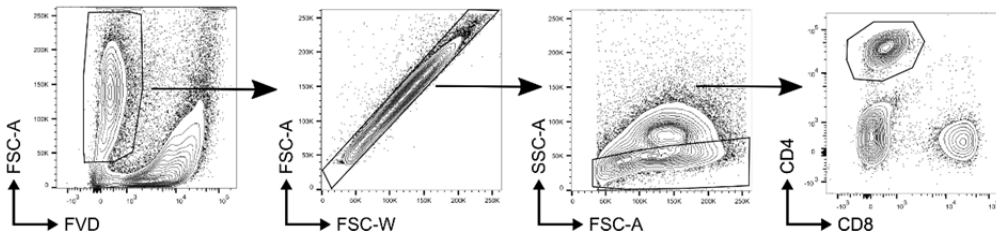

201  
202  
203 **Supplementary Figure 9. Gating strategy.** CD4<sup>+</sup> T cells from the dLNs and CNS were gated on live, single  
204 cell lymphocytes, CD4 and CD8. Cytokines, surface markers and transcription factors were shown the CD4<sup>+</sup> T  
205 cells. A similar strategy of gating was used for *in vitro* polarization on CD4<sup>+</sup> T cells, as well as for transduced  
206 CD4<sup>+</sup> T cells with retroviruses. Transduced CD4<sup>+</sup> T cells were additionally gated on GFP, or CD90.1.

201  
202  
203  
204  
205  
206  
207  
208  
209  
210  
211  
212  
213  
214  
215  
216  
217  
218  
219  
220  
221  
222  
223  
224  
225  
226  
227  
228  
229

| Protein Name                                       | Accession | Calc PI | #AA | MW [kDA] | Stat3        |           |                  |       |                  |                         |       | Stat3+Hectd3 |           |                  |           |                  |                         |       |
|----------------------------------------------------|-----------|---------|-----|----------|--------------|-----------|------------------|-------|------------------|-------------------------|-------|--------------|-----------|------------------|-----------|------------------|-------------------------|-------|
|                                                    |           |         |     |          | Coverage [%] | #Peptides | #Unique Peptides | Area  | HT Sequest Score | Confidence (Sequest HT) | #PSMs | Coverage [%] | #Peptides | #Unique Peptides | Area      | HT Sequest Score | Confidence (Sequest HT) | #PSMs |
| E3 ubiquitin-protein ligase HECTD3                 | Q5T447    | 5.64    | 861 | 97.05    | 0            | 0         | 0                | 0     | 0                | n/a                     | 0     | 14.9825784   | 10        | 10               | 2.80E+07  | 28.93            | High                    | 13    |
| Signal transducer and activator of transcription 3 | P40763    | 6.3     | 770 | 88       | 82.14286     | 4         | 1                | 1E+09 | 97.49            | High                    | 31    | 71.2987013   | 53        | 50               | 1.449E+10 | 1440.17          | High                    | 602   |

## Supplementary Table 1

**Mass spectrometry-based analysis of Stat3 and Hectd3.** HEK293T cells were co-transfected with HA-Ub and Flag-Stat3 (Stat3), or co-transfected with HA-Ub, Flag-Stat3 and Xpress-Hectd3 (Stat3+Hectd3), and immunoprecipitated with anti-Flag antibodies, followed by trypsin digestion and Tandem Mass Spectrometry, as described in Material and Methods. Confidence was assigned by Sequest HT algorithm, which was used in conjunction with q-value calculator and posterior error probability (PEP) test to assign peptide confidence. Sequence coverage, number of identified peptides, number of unique peptides, sum of area of all peptides identified, sum of Sequest HT score, confidence and number of PSMs is shown per each protein in each sample. False discovery rate was 0.011% for peptide groups in Flag IP sample from HEK293T cells co-transfected Flag-Stat3 and Xpress-Hectd3 vectors (Stat3+Hectd3) and 0.01% for Flag IP sample from HEK293T cells transfected with Flag-Stat3 vector (Stat3).

| Confidence Sequest HT | Sequence         | Modifications      | Quality PEP | Quality q-value | # PSMs | Master Protein Accessions | # Missed Cleavages | Theo. MH+ [Da] | Area                | XCorr Sequest HT | Percolator q-Value Sequest HT | Percolator PEP Sequest HT |
|-----------------------|------------------|--------------------|-------------|-----------------|--------|---------------------------|--------------------|----------------|---------------------|------------------|-------------------------------|---------------------------|
| High                  | DFPAVDSVLVK      |                    | 0.0099      | 0.0023          | 2      | Q5T447                    | 0                  | 1189.64632     | 7630788             | 2.05             | 0.008364                      | 0.04593                   |
| High                  | EQVAAMQAGLLK     |                    | 0.0013      | 0.0003          | 1      | Q5T447                    | 0                  | 1258.68238     | 11545471            | 2.41             | 0.000253                      | 0.001138                  |
| High                  | FIAEGIIDQGGGFR   |                    | 0.0121      | 0.0031          | 1      | Q5T447                    | 0                  | 1479.75905     | 24512584            | 2.17             | 0.002746                      | 0.009738                  |
| High                  | LEGTDPVLYR       |                    | 0.0004      | 0               | 1      | Q5T447                    | 0                  | 1291.65286     | 14586199            | 2.23             | 0                             | 0.000369                  |
| High                  | LVPIDTPNHLQR     | 1xDeamidated [N8]  | 0.0003      | 0               | 2      | Q5T447                    | 0                  | 1403.76414     | 45346712            | 2.71             | 0                             | 0.000261                  |
| High                  | RVVVGEGEDNLK     | 1xDeamidated [N11] | 0.0236      | 0.005           | 1      | Q5T447                    | 2                  | 1534.82238     | unable to calculate | 2.66             | 0.004143                      | 0.0187                    |
| High                  | RVVVGEGEDNLK     |                    | 5E-05       | 0               | 1      | Q5T447                    | 2                  | 1533.83837     | 5882221             | 2.91             | 0                             | 4.68E-05                  |
| High                  | TANQGNGTGEAR     | 1xDeamidated [N6]  | 0.0008      | 0               | 1      | Q5T447                    | 0                  | 1176.52397     | 3043183             | 2.55             | 0                             | 0.000653                  |
| High                  | VLLPVWEAEGGLR    |                    | 0.0479      | 0.0094          | 1      | Q5T447                    | 0                  | 1551.88934     | 15091793            | 1.19             | 0.007354                      | 0.03743                   |
| High                  | VVPQAVDLLTWQELEK |                    | 0.0108      | 0.0025          | 1      | Q5T447                    | 0                  | 1981.10045     | 1225384             | 2.43             | 0.002379                      | 0.008753                  |
| High                  | WEQVVDLTYSHR     |                    | 0.0006      | 0               | 1      | Q5T447                    | 0                  | 1532.74922     | 3455042             | 2.78             | 0                             | 0.00052                   |

258

259 **Supplementary Table 2**

260 **Mass spectrometric analysis of Hectd3 peptides.** HEK293T cells were co-transfected with HA-Ub and Flag-  
261 Stat3 (Stat3), or co-transfected with HA-Ub, Flag-Stat3 and Xpress-Hectd3 (Stat3+Hectd3), and  
262 immunoprecipitated with anti-Flag antibodies, followed by trypsin digestion and Tandem Mass Spectrometry,  
263 as described in Material and Methods. XCorr values were calculated by utilizing Sequest HT algorithm and  
264 used for calculating peptide confidence. Percolator was additionally used to discriminate between correct and  
265 incorrect peptide matches. Statistical analysis by q-value and posterior error probability (PEP) were used to  
266 increase confidence in the peptide identifications at a false discovery rate of 0.011% for peptide groups.

267

268

269

270

271

272

273

274

275

276

277

278

279

280

| Peptide               | Modifications                                               | Position (residue number) | Modification Position | Protein Accession Number(s) | Stat3            |                |                    |                         |       | Stat3+Hectd3     |                |                    |                         |       |
|-----------------------|-------------------------------------------------------------|---------------------------|-----------------------|-----------------------------|------------------|----------------|--------------------|-------------------------|-------|------------------|----------------|--------------------|-------------------------|-------|
|                       |                                                             |                           |                       |                             | XCorr Sequest HT | Percolator PEP | Percolator q-value | Confidence (Sequest HT) | #PSMs | XCorr Sequest HT | Percolator PEP | Percolator q-value | Confidence (Sequest HT) | #PSMs |
| TLkSQGDMQDLNGNNQSVTR  | K3(GlyGly)                                                  | 178-197                   | K180                  | P40763                      |                  |                |                    |                         |       | 2.58             | 0.0242         | 0.00511            | High                    | 1     |
| TLkSQGDMQDLnGNNQSVTR  | K3(GlyGly); N12(Deamidated)                                 | 178-197                   | K180;N189             | P40763                      |                  |                |                    |                         |       | 2.24             | 0.0124         | 0.00275            | High                    | 1     |
| TLkSQGDmQDLnGnNQSIVTR | K3(GlyGly); M8(Oxidation); N12(Deamidated); N14(Deamidated) | 178-197                   | K180;M185;N189;N191   | P40763                      |                  |                |                    |                         |       | 2.91             | 0.00364        | 0.00136            | High                    | 1     |
| TLkSQGDMQDLNGnNQSIVTR | K3(GlyGly); N14(Deamidated)                                 | 178-197                   | K180;N191             | P40763                      |                  |                |                    |                         |       | 2.25             | 0.021          | 0.00492            | High                    | 1     |
| DISGkTQIQSVPEPYTK     | K5(GlyGly)                                                  | 627-642                   | K631                  | P40763                      | 2.96             | 0.0497         | 0.00618            | High                    | 1     |                  |                |                    |                         |       |
| AILSTkPPGTFLLR        | K6(GlyGly)                                                  | 596-609                   | K601                  | P40763                      | 2.36             | 0.00015        | 0                  | High                    | 1     |                  |                |                    |                         |       |

### Supplementary Table 3

**Mass spectrometry-based analysis of ubiquitinated Stat3 peptides.** HEK293T cells were co-transfected with HA-Ub and Flag-Stat3 (Stat3), or co-transfected with HA-Ub, Flag-Stat3 and Xpress-Hectd3 (Stat3+Hectd3), and immunoprecipitated with anti-Flag antibodies, followed by trypsin digestion and Tandem Mass Spectrometry, as described in Material and Methods. XCorr values were calculated by utilizing Sequest HT algorithm and used for calculating peptide confidence. Percolator was additionally used to discriminate between correct and incorrect peptide matches. Statistical analysis by q-value and posterior error probability (PEP) were used to increase confidence in the peptide identifications at a false discovery rate of 0.011 % for Flag IP sample from HEK293T cells co-transfected Flag-Stat3 and Xpress-Hectd3 vectors (Stat3+Hectd3) and 0.01% for Flag IP sample from HEK293T cells transfected with Flag-Stat3 vector (Stat3).

| Name of primer            | Sequence                                           |
|---------------------------|----------------------------------------------------|
| Hectd3 forward            | 5'-GGAAGATCTCCTCCTCCTGCCGGCCCTGGC-3'               |
| Hectd3 reverse            | 5'- CCGCTCGAGTCACTCCTCCCAGGGACT-3'                 |
| Stat3 forward             | 5'-AGTCAGACTGAGATCTCCACCATGGCTCAGTGGAAACCAGCTG-3'  |
| Stat3 reverse             | 5'- AGTCTCAGTGCTCGAGTTATCACATGGGGGAGGTAGCACACTC-3' |
| Stat3 K180R forward       | 5'- CAAAACCTCAGGAGCCAAGGAG-3'                      |
| Stat3 K180R reverse       | 5'- TAGTTGAAATCAAAGTCGTCCTG-3'                     |
| Malt1A K648R forward      | 5'- AGATGCAAATAGAGGCACACCTG-3'                     |
| Malt1A K648R reverse      | 5'- TTTGGATCAATATCTAGATCAAGTG-3'                   |
| Stat3 Δaa2-130 forward    | 5'-CACCCAACAGCCGCGTAG-3'                           |
| Stat3 Δaa2-130 reverse    | 5'-CATGGCGATCGCGGCGGC-3'                           |
| Stat3 Δaa131-320 forward  | 5'-TTCGTGGTGGAGCGGCAG-3'                           |
| Stat3 Δaa131-320 reverse  | 5'-GTTGGCCTGGCCCCCTTG-3'                           |
| Stat3 Δaa320-480 forward  | 5'-AACATGCTGACCAATAAC-3'                           |
| Stat3 Δaa320-480 reverse  | 5'-ACTCTTCATTAAGTTTCTGAAC-3'                       |
| Stat3 Δaa481-574 forward  | 5'-TATATCTTGGCCCTTTGG-3'                           |
| Stat3 Δaa481-574 reverse  | 5'-ATACCACAGGATTGATGC-3'                           |
| Stat3 Δaa576-679 forward  | 5'-GAGGAGGCATTTGGAAAG-3'                           |
| Stat3 Δaa576-679 reverse  | 5'-ATACTTTTTTACAAGGTCG-3'                          |
| Stat3 Δaa671-770 forward  | 5'-ACGCGTACGCGGCCGCTC-3'                           |
| Stat3 Δaa671-770 reverse  | 5'-CTCCTTGGGAATGTCGGGGTAGAGG-3'                    |
| Hectd3 Δaa2-109 forward   | 5'-GAGCTGTGCAACGGCCAC-3'                           |
| Hectd3 Δaa2-109 reverse   | 5'-AGGAGGAGGCAGATCCTC-3'                           |
| Hectd3 Δaa110-397 forward | 5'-GGCACTGACCCAGAAGTACTATAC-3'                     |
| Hectd3 Δaa110-397 reverse | 5'-CTCGCCAGTGGTGCGCAC-3'                           |
| Hectd3 Δaa398-511 forward | 5'-TATGAGAAGCCCTTGGAC-3'                           |
| Hectd3 Δaa398-511 reverse | 5'-TTCCAGGCGTGATATCG-3'                            |
| Hectd3 Δaa512-861 forward | 5'-TGA CTGAGTCTAGAGGG-3'                           |
| Hectd3 Δaa512-861 reverse | 5'-CTTGTCAGAAGGCTTGAG-3'                           |
| HA-Ub K6R forward         | 5'-GATCTTCGTGaggACCCTGACCGGCAAGACCATC-3'           |
| HA-Ub K6R reverse         | 5'-TGCATGCCGCCGCCGCCG-3'                           |
| HA-Ub K6,11R forward      | 5'-CCTGACCGGCagaACCATCACCC-3'                      |
| HA-Ub K6,11R reverse      | 5'-GTCCTCACGAAGATCTGC-3'                           |
| HA-Ub K6,11,27R forward   | 5'-CGAGAACGTGaggGCCAAGATCC-3'                      |
| HA-Ub K6,11,27R reverse   | 5'-ATGGTGTGCTGGGCTCC-3'                            |



|                                           |                                       |
|-------------------------------------------|---------------------------------------|
| HA-Ub K6,11,27,29R<br>forward             | 5'-CGTGAGGGCCagaATCCAGGACA-3'         |
| HA-Ub K6,11,27,29R<br>reverse             | 5'-TTCTCGATGGTGTCTCGCTG-3'            |
| HA-Ub K6,11,27,29,33R<br>forward          | 5'-AATCCAGGACagaGAGGGCATCCCC-3'       |
| HA-Ub K6,11,27,29,33R<br>reverse          | 5'-CTGGCCCTCACGTTCTCG-3'              |
| HA-Ub K6,11,27,29,33,48R<br>forward       | 5'-CTTCGCCGGCagaCAGCTGGAGG-3'         |
| HA-Ub K6,11,27,29,33,48R<br>reverse       | 5'-ATCAGTCTCTGCTGGTCG-3'              |
| HA-Ub<br>K6,11,27,29,33,48,63R<br>forward | 5'-CAACATCCAGagaGAGAGCACCCCTG-3'      |
| HA-Ub<br>K6,11,27,29,33,48,63R<br>reverse | 5'-TAGTCGCTCAGGGTTCTG-3'              |
| HA-Ub K6 only forward                     | 5'-GATCTTCGTGaagACCCTGACCGGCAGAACC-3' |
| HA-Ub K6 only reverse                     | 5'-TGCATGCCGCCGCCGCCG-3'              |
| HA-Ub K11 only forward                    | 5'-CCTGACCGGCaagACCATCACCC-3'         |
| HA-Ub K11 only reverse                    | 5'-GTCCTCACGAAGATCTGC-3'              |
| HA-Ub K27 only forward                    | 5'-CGAGAACGTGaagGCCAGAATCC-3'         |
| HA-Ub K27 only reverse                    | 5'-ATGGTGTCTGCTGGGCTCC-3'             |
| HA-Ub K29 only forward                    | 5'-CGTGAGGGCCaagATCCAGGACA-3'         |
| HA-Ub K29 only reverse                    | 5'-TTCTCGATGGTGTCTCGCTG-3'            |
| HA-Ub K33 only forward                    | 5'-AATCCAGGACaagGAGGGCATCCCC-3'       |
| HA-Ub K33 only reverse                    | 5'-CTGGCCCTCACGTTCTCG-3'              |
| HA-Ub K48 only forward                    | 5'-CTTCGCCGGCaagCAGCTGGAGG-3'         |
| HA-Ub K48 only reverse                    | 5'-ATCAGTCTCTGCTGGTCG-3'              |

312

313 **Supplementary Table 4**314 **Primers used for PCR cloning and mutagenesis**

315

316 **References**317 1. Ciofani, M. *et al.* A validated regulatory network for Th17 cell specification. *Cell* **151**, 289-303 (2012).

318
